# Supplementary material for: Comparative muscle transcriptome associated with carcass traits of Nellore cattle
Source: PubMed Central journal article supplement (PMC5496360; doi:10.1186/s12864-017-3897-x), 2017-07-03

Figure S3 – Histogram of p-values from RNA-Seq data of *Longissimus dorsi* muscle of Nellore steers by DESeq2 software, for ribeye area.

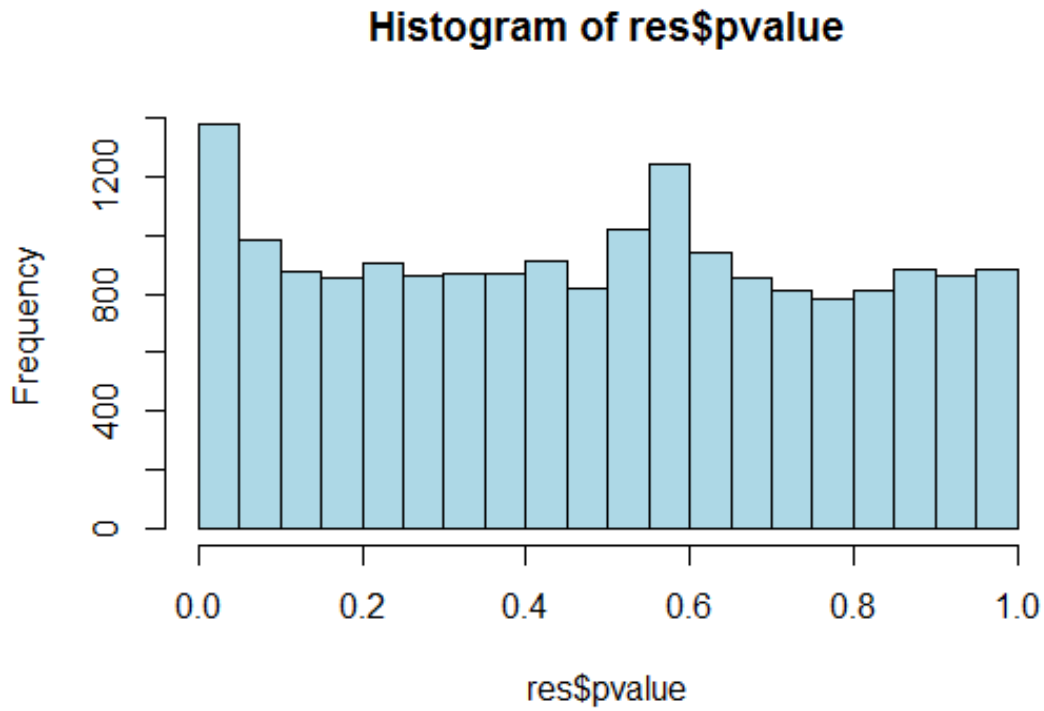

Figure S4 – Histogram of p-values from RNA-Seq data of *Longissimus dorsi* muscle of Nellore steers by DESeq2 software, for backfat thickness.

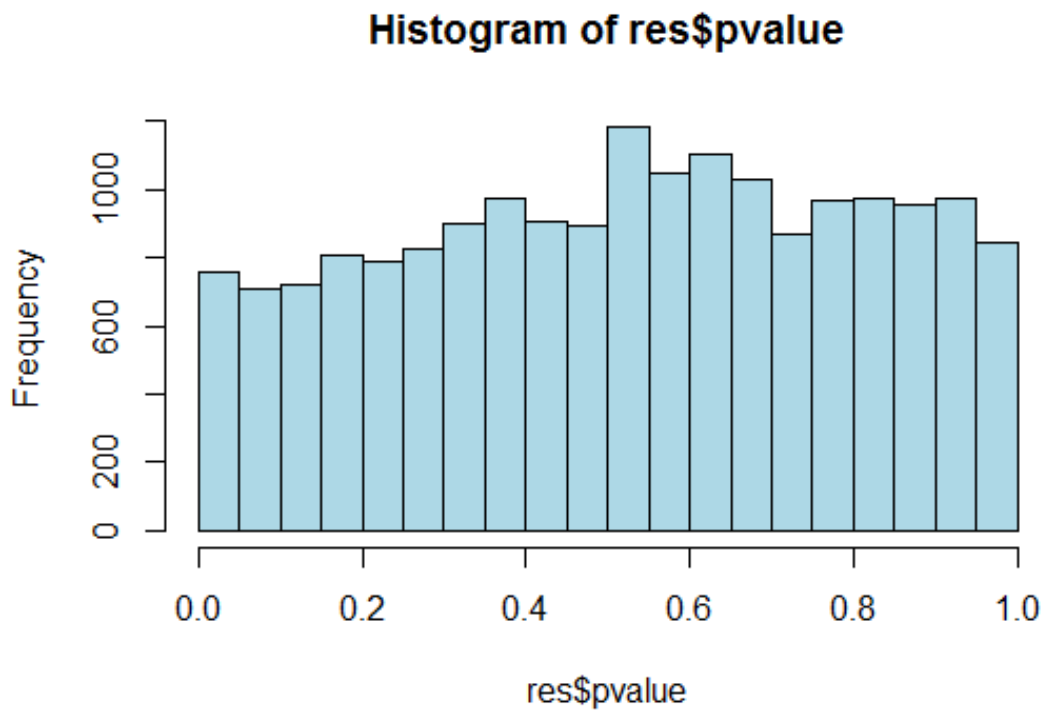

Supplement: 12864_2017_3897_MOESM7_ESM.pdf [file 12864_2017_3897_MOESM7_ESM.pdf]
